# Supplementary material for: Antibiotic resistance potential of the healthy preterm infant gut microbiome
Source: PubMed Central journal article supplement (PMC5270596; doi:10.7717/peerj.2928), 2017-01-25
Supplement: peerj-05-2928-s001.pdf [file peerj-05-2928-s001.pdf]

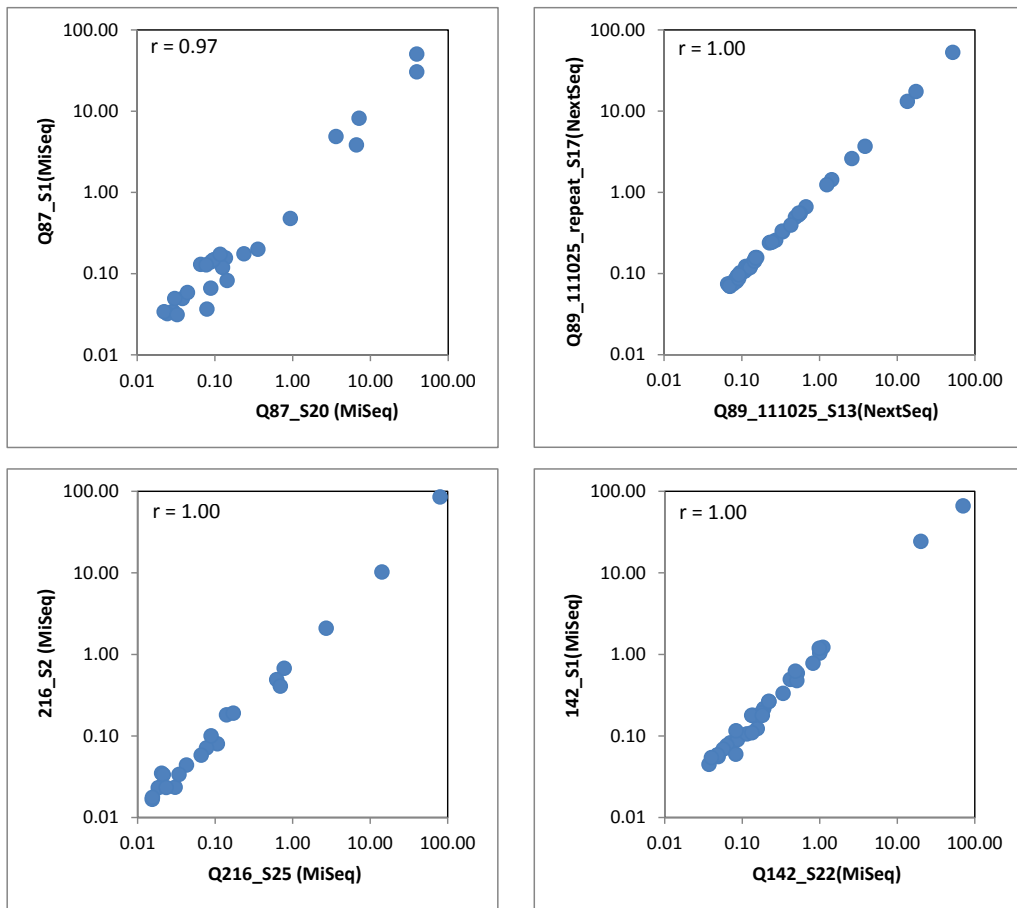

**Figure S1. Correlation of replicates by species abundance.** Pearson correlations of species relative abundance for the four replicates, including within run and across machine types.
