# Supplementary material for: Antibiotic resistance potential of the healthy preterm infant gut microbiome
Source: PubMed Central journal article supplement (PMC5270596; doi:10.7717/peerj.2928), 2017-01-25
Supplement: peerj-05-2928-s002.pdf [file peerj-05-2928-s002.pdf]

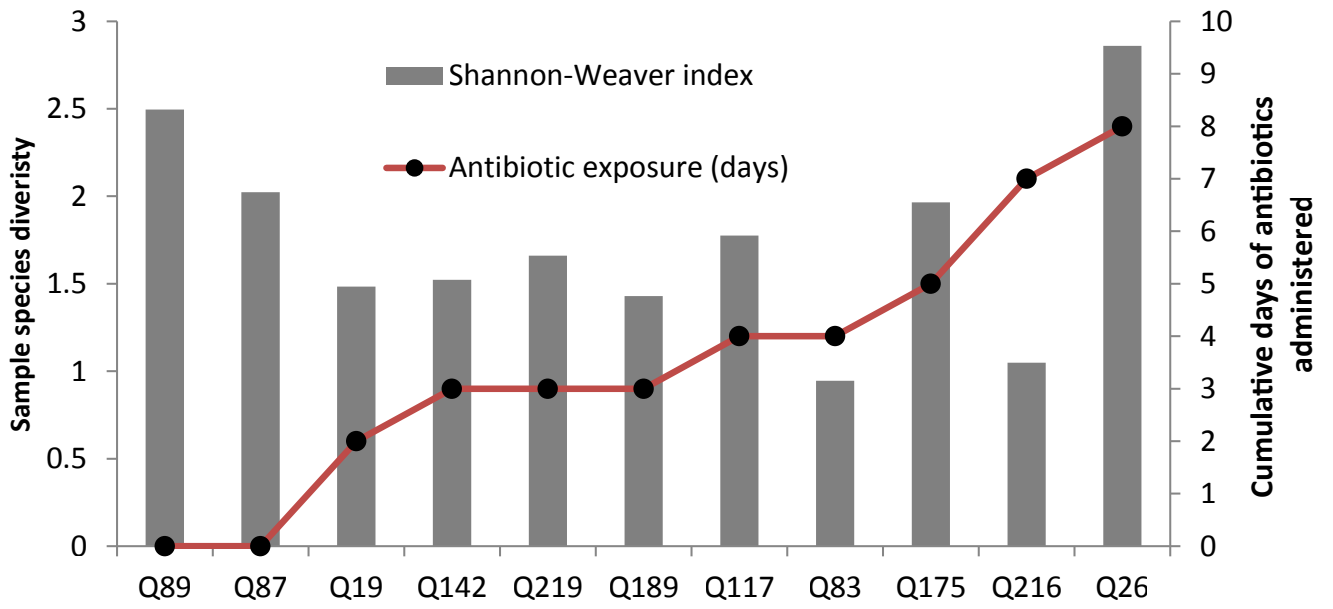

**Figure S2. Metagenome diversity.** Diversity measured using the Shannon-Weaver index on left axis, and total antibiotic exposure in days on right axis.
