# Supplementary material for: Antibiotic resistance potential of the healthy preterm infant gut microbiome
Source: PubMed Central journal article supplement (PMC5270596; doi:10.7717/peerj.2928), 2017-01-25
Supplement: peerj-05-2928-s003.pdf [file peerj-05-2928-s003.pdf]

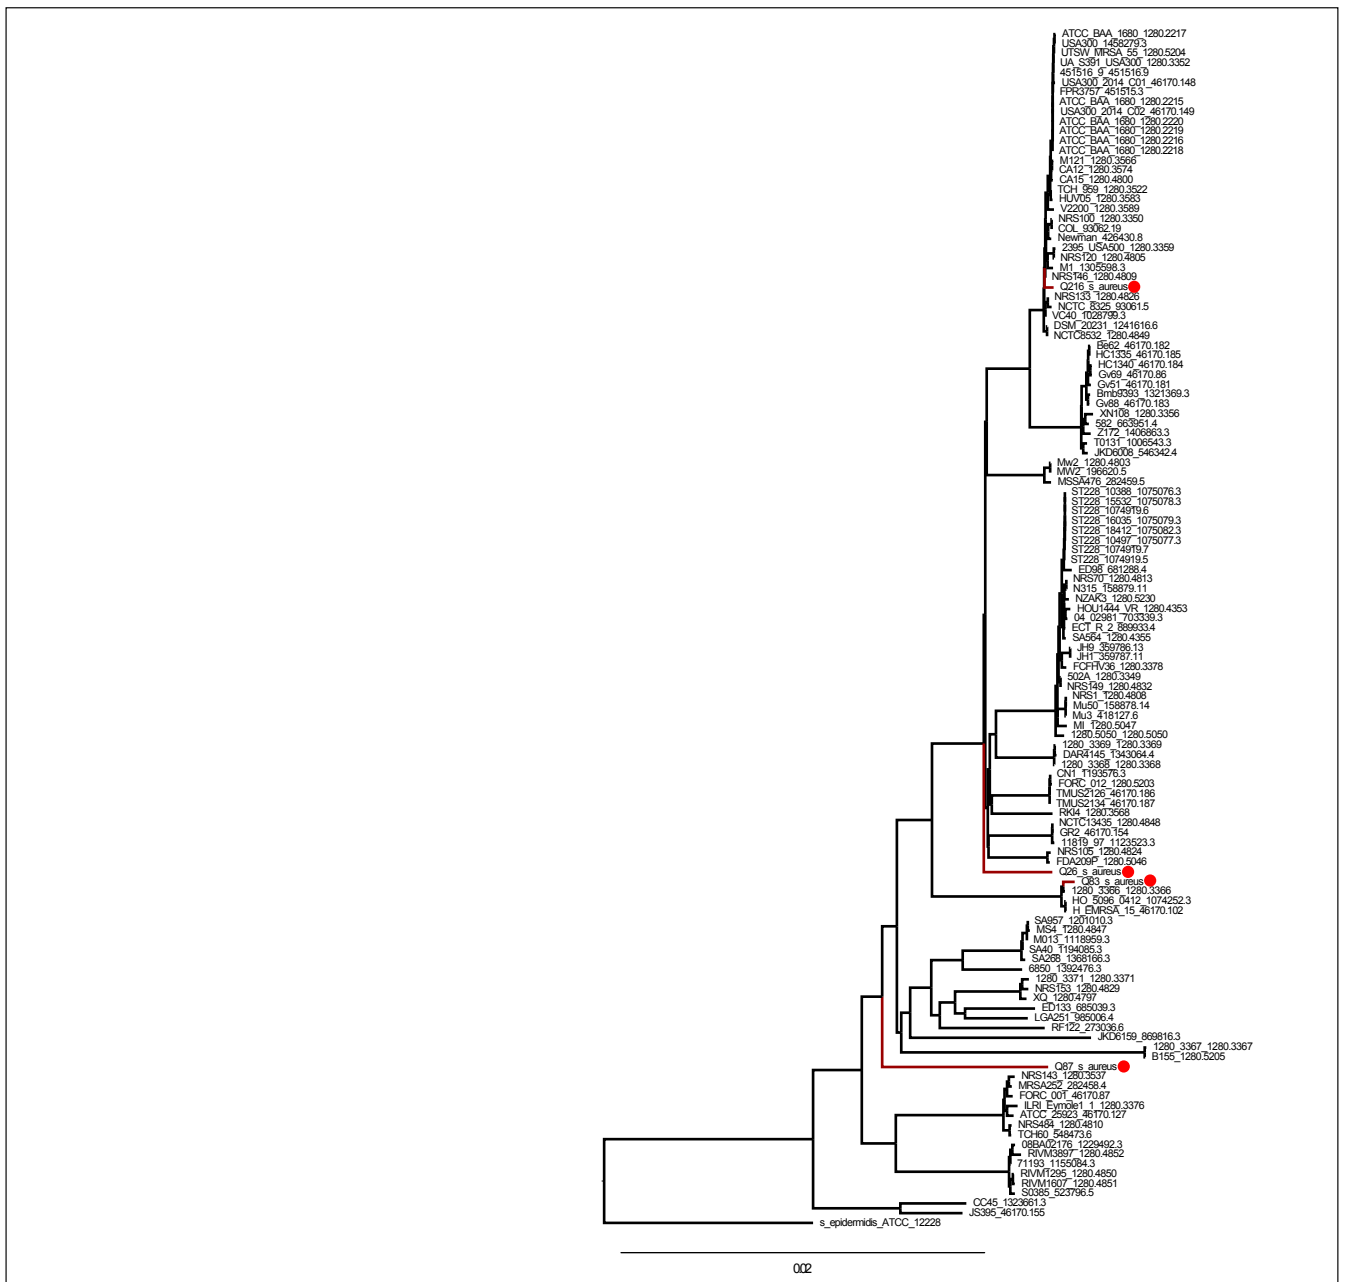

**Figure S3. *S. aureus* phylogeny.** Neighbor-joining tree built using estimated distances between a collection of 118 complete *S. aureus* genomes, and assembled *S. aureus* genomes from 4 preterm infant metagenomes. Genomes derived from the premature infant samples are highlighted in red. *S. epidermidis* used as the outlier, and this branch has been truncated for presentation purposes. Scale bar shows number of nucleotide substitutions per site.
