# Supplementary material for: Antibiotic resistance potential of the healthy preterm infant gut microbiome
Source: PeerJ. 2017 Jan 25;5:e2928. doi: 10.7717/peerj.2928 (PMC5270596; doi:10.7717/peerj.2928)
Supplement: Table S1 — Columns show sample details, including gestation at birth mode of delivery, maternal and infant antibiotic courses given, and day of life of sample used within study. [file peerj-05-2928-s004.xlsx]

## Sheet: Sheet1
	Table S1. Sample clinical data. Columns show sample metadata, including gestation at birth, mode of delivery, maternal and infant antibiotic courses given, and day of life of sample used within study. Delivery type, VD: Vaginal delivery or CS: Caesarean section. DOL: Day of Life.
	Sample	Gestation at birth	Delivery	Maternal antibiotics in pregnancy	Maternal antibiotics in labour	Antibiotic (Course 1)	DOL	Antibiotic (Course 2)	DOL	DOL of Sample
	Q19	28+5	CS	-	-	Co-amoxiclav	1,2	-	-	5
	Q26	26+2	VD	Erythromycin and augmentin	-	Co-amoxiclav	1,2,3,4,5	Co-amoxiclav	14,15,16	43
	Q83	25+3	VD	-	-	Co-amoxiclav	1,2	Tazocin, Vancomycin	17,18	27
	Q87	27+1	CS	-	-	-	-	-	-	24
	Q89	31+4	CS	-	-	-	-	-	-	6
	Q117	25+0	VD		Co-amoxiclav	Co-amoxiclav	1,2,3,4	-	-	35
	Q142	31+1	VD	-	-	Co-amoxiclav	1,2,3	-	-	14
	Q175	24+6	VD	-	-	Co-amoxiclav	1,2	Tazocin, Vancomycin	4,5,6	40
	Q189	25+1	VD	-	Cefuroxime and Metronidazole	Co-amoxiclav	1,2,3	-	-	17
	Q219	26+2	CS	-	-	Co-amoxiclav	1,2,3	-	-	32
	Q216	28+1	CS	-	-	-	-	Tazocin, Vancomycin	4,5,6,7,8,9,10	40
