# Supplementary material for: Antibiotic resistance potential of the healthy preterm infant gut microbiome
Source: PeerJ. 2017 Jan 25;5:e2928. doi: 10.7717/peerj.2928 (PMC5270596; doi:10.7717/peerj.2928)
Supplement: Table S5 — Genes identified within the eleven samples by SRST2. Columns show gene, antibiotic class and frequency. [file peerj-05-2928-s008.xlsx]

## Sheet: Sheet1
	Table S5. AMR gene frequency. Genes identified within the eleven samples by SRST2. Columns show gene, antibiotic class and frequency.
	Gene	Antibiotic class abbreviation	Antibiotic class	Frequency within samples
	BlaZ	Bla	β-lactam	11
	DfrC	Tmt	trimethoprim	9
	OqxBgb	Flq	fluoroquinolones	7
	LsaA	MLS	macrolide-lincosamide- streptogramin	7
	MphD	MLS	macrolide-lincosamide- streptogramin	7
	AmpC2_Ecoli	Bla	β-lactam	4
	AMPH_Ecoli	Bla	β-lactam	4
	OXY	Bla	β-lactam	6
	PBP_Ecoli	Bla	β-lactam	4
	OqxA	Flq	fluoroquinolones	6
	Aac3-Ik	AGly	aminoglycosides	5
	APH-Stph	AGly	aminoglycosides	5
	SHV-OKP-LEN	Bla	β-lactam	5
	Dha1	Phe	phenicols	5
	Tet-38	Tet	tetracyclines	5
	ACT-MIR	Bla	β-lactam	3
	AmpH	Bla	β-lactam	4
	MECA	Bla	β-lactam	4
	FosB	Fos	fosfomycin	4
	norA	Flq	fluoroquinolones	4
	MsrA	MLS	macrolide-lincosamide- streptogramin	4
	Aac6-Aph2	AGly	aminoglycosides	3
	TetA-P	Tet	tetracyclines	3
	TetO	Tet	tetracyclines	3
	Ant6-Ia	AGly	aminoglycosides	2
	AmpC1_Ecoli	Bla	β-lactam	2
	LnuB	MLS	macrolide-lincosamide- streptogramin	2
	MphC	MLS	macrolide-lincosamide- streptogramin	2
	MsrD	MLS	macrolide-lincosamide- streptogramin	2
	Dfr	Tmt	trimethoprim	2
	Aac6-Ic	AGly	aminoglycosides	1
	Aac6-Ii	AGly	aminoglycosides	1
	AadC	AGly	aminoglycosides	1
	LnuA	MLS	macrolide-lincosamide- streptogramin	1
	MsrC	MLS	macrolide-lincosamide- streptogramin	1
	VgaA	MLS	macrolide-lincosamide- streptogramin	1
	FloR	Phe	phenicols	1
	TetB-P	Tet	tetracyclines	1
	TetW	Tet	tetracyclines	1
	Total			143
