# Supplementary material for: Antibiotic resistance potential of the healthy preterm infant gut microbiome
Source: PeerJ. 2017 Jan 25;5:e2928. doi: 10.7717/peerj.2928 (PMC5270596; doi:10.7717/peerj.2928)
Supplement: Table S7 — PCR results from the mecA internal positive control amplicon region, showing the closest peak to the expected 161 bp amplicon size and corresponding concentration of this. All eleven premature infant samples were tested, alongside known mecA positive and negative S. aureus strains, and water only extraction and PCR negative controls. *: samples with predicted mecA presence based on set thresholds of expected amplicon size ±5 bp and peak concentration >500 pg/ul. See Milheiriço, Oliveira & De Lencastre (2007) for more details on amplicon regions. [file peerj-05-2928-s010.xlsx]

## Sheet: Sheet1
	Table S7. Confirmation of mecA. PCR results from the mecA internal positive control amplicon region, showing the closest peak to the expected 161 bp amplicon size and corresponding concentration of this. All eleven premature infant samples were tested, alongside known mecA positive and negative S. aureus strains, and water only extraction and PCR negative controls. *: samples with predicted mecA …
			MecA internal positive control amplicon
	Sample	Predicted mecA positive	Positive mecA sample *	Amplicon size (bp)	Amplicon concentration (pg/ul)
	Q19			162	192.86
	Q26			161	83.44
	Q83			203	92.89
	Q87	Y		161	45.24
	Q89			179	20.11
	Q117	Y	Y	159	637.25
	Q142			160	22.63
	Q175	Y	Y	160	913.81
	Q189	Y	Y	158	772.8
	Q216			154	19.45
	Q219			159	361.57
	Controls:
	DNA extraction using water only			152	5.22
	DNA extraction of MRSA strain (NCTC 12232)		Y	161	904.72
	DNA extraction of clinical MSSA strain			220	15.27
	PCR using MRSA strain (NCTC 12232)		Y	161	972.57
	PCR using clinical MSSA strain			161	5.96
	PCR using water			161	5.05
