# Supplementary material for: Antibiotic resistance potential of the healthy preterm infant gut microbiome
Source: PeerJ. 2017 Jan 25;5:e2928. doi: 10.7717/peerj.2928 (PMC5270596; doi:10.7717/peerj.2928)
Supplement: Table S9 — All contigs within S. aureus bin ≥1 kb shown. Estimated capture based on expected S. aureus median length of 2.9 Mb. [file peerj-05-2928-s012.xlsx]

## Sheet: Sheet1
	Table S9. Assembled S. aureus genomes. All contigs within S. aureus bin ≥ 1 kb shown. Estimated capture based on expected S. aureus median length of 2.9Mb.
	Sample	Relative abundance of S. aureus within sample (%)	Number of assembled contigs (>=1 kb)	Assembly length (bp)	Estimated genome capture (%)
	Q175	0.0669516	0	0	0
	Q142	0.0830542	0	0	0
	Q189	0.0925824	13	20092	0.703615
	Q89	0.330763	1	3270	0.114514
	Q219	0.376782	3	5014	0.175589
	Q19	0.826442	4	8374	0.293255
	Q117	1.65607	355	504105	17.6536
	Q83	3.72257	72	2616948	91.6446
	Q26	4.15083	47	2752061	96.3762
	Q216	14.1866	47	2752061	96.3762
	Q87	39.7756	175	2779626	97.3415
